# Supplementary material for: This facile interconversion of dinuclear double helicates and side-by-side species: a reprogrammable ligand with potential sensor applications
Source: Royal Society of Chemistry journal article supplement (doi:10.1039/b600597g), 2006-01-01
Supplement: b600597g.pdf [file b600597g.pdf]

## Facile Interconversion of Dinuclear Double Helicates and Side-by-Side Species: A Reprogrammable Ligand with Potential Sensor Applications.

Georgios Bokolinis, T. Riis-Johannessen, Lindsay P. Harding, John. C. Jeffery, Neil McLay, Craig R. Rice\*.

### Electronic Supplementary Information

$^1\text{H}$  NMR of  $[\text{Cu}_2(\text{L}^1)_2]^{2+} + \text{Ba}^{2+}$  (**3**) and  $[\text{Cu}_2(\text{L}^1)_2]^{2+} + \text{Na}^+$  (**2**).

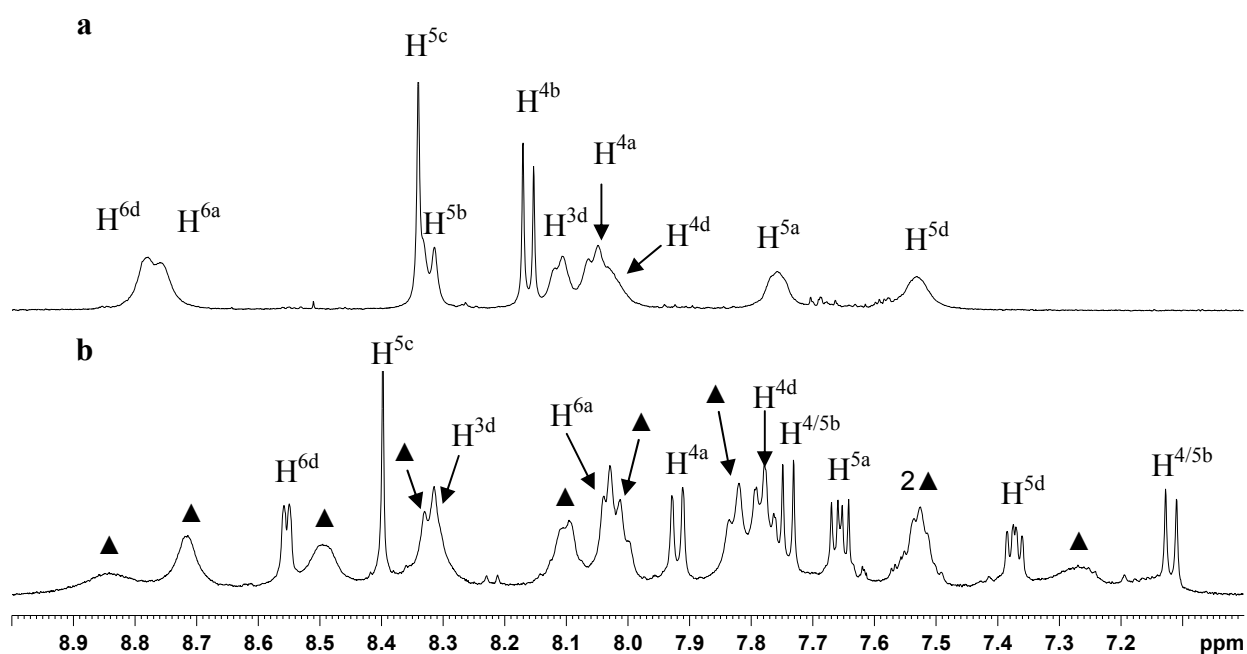

**Figure 1.** Aromatic regions of the  $^1\text{H}$  NMR ( $\text{CD}_3\text{CN}$ ) spectra of **a**)  $[\text{Cu}_2(\text{L}^1)_2]^{2+} + \text{Ba}^{2+}$  (**3**) (295K) and **b**)  $[\text{Cu}_2(\text{L}^1)_2]^{2+} + \text{Na}^+$  (**2**) (243K). The assigned peaks correspond to the side-by-side structure and the helicate species are indicated by ▲.

## Synthetic Details

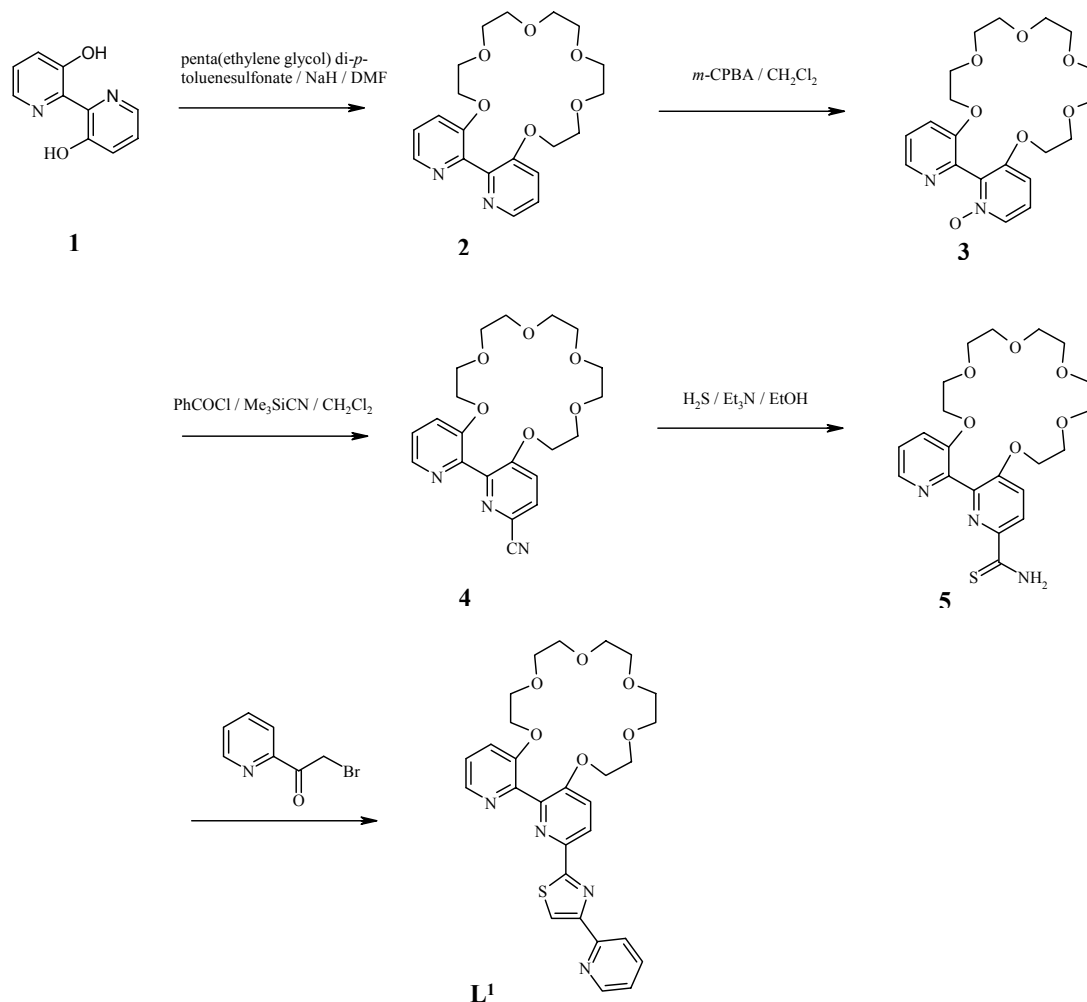

The starting material 2,2'-bipyridine-3,3'-diol **1** was prepared by literature methods<sup>1</sup>, as well as 2,2'-bipyridine 20-crown-6 derivative **2**.<sup>2</sup>

### Synthesis of **3**.

To a solution of **2** (0.70g, 1.80 mmol) in CH<sub>2</sub>Cl<sub>2</sub> (20 cm<sup>3</sup>) was added 3-chloroperbenzoic acid (50%, 0.50g, 1.45 mmol). The reaction was followed by TLC and on completion, the solvent was removed under vacuum (Care: *N*-oxides are potentially explosive) leaving crude *N*-oxide as thick pale yellow oil. This was then purified by column chromatography (3% MeOH in CH<sub>2</sub>Cl<sub>2</sub>, Al<sub>2</sub>O<sub>3</sub>) giving **3** as thick clear oil (0.52g, 71% yield). <sup>1</sup>H NMR (400MHz, CDCl<sub>3</sub>) δ 8.30 (dd, *J* = 1.3, 4.6 Hz, 1H), 7.95 (d, *J* = 6.5 Hz, 1H), 7.34 (dd, *J* = 8.5, 1.3 Hz, 1H), 7.27 (dd, *J* = 4.6, 8.5 Hz, 1H), 7.13 (dd, *J* = 6.5, 8.6 Hz, 1H), 6.91 (d, *J* = 8.2 Hz, 1H), 4.20 – 3.95 (m, 4H, -CH<sub>2</sub>-), 3.75 – 3.45 (m, 16H, -CH<sub>2</sub>-). ESI-MS: *m/z* 409 [M+H<sup>+</sup>], C<sub>20</sub>H<sub>27</sub>N<sub>2</sub>O<sub>7</sub> requires 407.1813 found 407.1811. Elemental Analysis calculated for C<sub>20</sub>H<sub>26</sub>N<sub>2</sub>O<sub>7</sub>, C, 59.1; H, 6.4; N, 6.9%. Found: C, 58.7; H, 6.3; N, 6.5%.

### Synthesis of 4.

To a refluxing solution of **3** (0.35g, 0.86 mmol) and benzoyl chloride (0.15g, 1.00 mmol) in  $\text{CH}_2\text{Cl}_2$  (20  $\text{cm}^3$ ), trimethylsilyl cyanide (0.17g, 1.70 mmol) was added and heating was maintained for 8 hrs. After this time the solution was cooled and extracted with  $\text{NaHCO}_3(\text{aq})$  (3  $\times$  30  $\text{cm}^3$ ), dried ( $\text{MgSO}_4$ ) and the  $\text{CH}_2\text{Cl}_2$  removed under vacuum. The resulting light yellow oil was then purified by column chromatography (1% MeOH in  $\text{CH}_2\text{Cl}_2$ ,  $\text{Al}_2\text{O}_3$ ) giving **4** as yellow oil (0.22g, 61% yield).  $^1\text{H}$  NMR (400MHz,  $\text{CDCl}_3$ )  $\delta$  8.37 (dd,  $J = 2.7, 5.9$  Hz, 1H), 7.75 (d,  $J = 8.6$  Hz, 1H), 7.42 (d,  $J = 8.6$  Hz, 1H), 7.37 (2H, overlapping), 4.33 – 4.10 (m, 4H,  $-\text{CH}_2-$ ), 3.80 – 3.58 (m, 16H,  $-\text{CH}_2-$ ). ESI-MS:  $m/z$  416 [ $\text{M}+\text{H}^+$ ],  $\text{C}_{21}\text{H}_{26}\text{N}_3\text{O}_6$  requires 416.1816 found 416.1812. Elemental Analysis calculated for  $\text{C}_{21}\text{H}_{25}\text{N}_3\text{O}_6$ , C, 60.7; H, 6.1; N, 10.1%. Found: C, 60.9; H, 5.8; N, 9.9%.

### Synthesis of 5.

To a solution of **4** (0.14g, 0.30 mmol) in ethanol (20  $\text{cm}^3$ ) triethylamine (2  $\text{cm}^3$ ) was added.  $\text{H}_2\text{S}$  was then bubbled through this solution until the solution turned yellow, bubbling was continued for a further 2 minutes, and then the flask was stoppered and left overnight. Evaporation of the solvent gave a red/brown residue, which was purified using column chromatography (3% MeOH in  $\text{CH}_2\text{Cl}_2$ ,  $\text{Al}_2\text{O}_3$ ), giving **5** as a yellow solid (0.11g, 82% yield).  $^1\text{H}$  NMR (400MHz,  $\text{CDCl}_3$ )  $\delta$  9.30 (br s, 1H,  $-\text{NH}_2$ ), 8.74 (d,  $J = 8.8$  Hz, 1H), 8.32 (dd,  $J = 1.9, 4.0$  Hz, 1H), 7.46 (br s, 1H,  $-\text{NH}_2$ ), 7.40 (d,  $J = 8.8$  Hz, 1H), 7.34 (2H, overlapping), 4.35 – 4.18 (m, 2H,  $-\text{CH}_2-$ ), 4.13 – 3.98 (m, 2H,  $-\text{CH}_2-$ ), 3.85 – 3.50 (m, 16H,  $-\text{CH}_2-$ ). ESI-MS:  $m/z$  450 [ $\text{M}+\text{H}^+$ ],  $\text{C}_{21}\text{H}_{28}\text{N}_3\text{O}_6\text{S}$  requires 450.1693 found 450.1691. Elemental Analysis calculated for  $\text{C}_{21}\text{H}_{27}\text{N}_3\text{O}_6\text{S}$ , C, 56.1; H, 6.0; N, 9.3%. Found: C, 55.8; H, 5.8; N, 9.1%.

### Synthesis of $\text{L}^1$ .

To a solution of **5** (0.10g, 0.22 mmol) in ethanol (25  $\text{cm}^3$ ) was added 2-( $\alpha$ -bromoacetyl)-pyridine (0.05g, 0.25 mmol) and the reaction was heated at reflux for 3 hrs. After this time the solvent was removed resulting in a white oily solid. Neutralisation by  $\text{NaHCO}_3(\text{aq})$  and extraction into  $\text{CH}_2\text{Cl}_2$  (3  $\times$  30  $\text{cm}^3$ ) gave, upon removal of the solvent, crude  $\text{L}^1$ . Purification, using column chromatography (1% MeOH in  $\text{CH}_2\text{Cl}_2$ ,  $\text{Al}_2\text{O}_3$ ), gave  $\text{L}^1$  as pale brown oil (0.08g, 65%).  $^1\text{H}$  NMR (400MHz,  $\text{CDCl}_3$ )  $\delta$  8.62 (d,  $J = 4.5$  Hz, 1H), 8.36 (dd,  $J = 4.3, 1.4$  Hz, 1H), 8.32 (d,  $J = 8.6$  Hz, 1H), 8.23 (d,  $J = 7.9$  Hz, 1H), 8.07 (s, 1H), 7.78 (ddd,  $J = 1.7, 7.7, 7.7$  Hz, 1H), 7.42 (d,  $J = 8.7$  Hz, 1H), 7.32 (2H, overlapping), 7.22 (dd,  $J = 7.3, 5.3$  Hz, 1H), 4.30 – 4.10 (m, 4H,  $-\text{CH}_2-$ ), 3.70 – 3.55 (m, 16H,  $-\text{CH}_2-$ ). ESI-MS:  $m/z$  551 [ $\text{M}+\text{H}^+$ ],  $\text{C}_{28}\text{H}_{31}\text{N}_4\text{O}_6\text{S}$  requires 551.1958 found 551.1969. Elemental Analysis calculated for  $\text{C}_{28}\text{H}_{30}\text{N}_4\text{O}_6\text{S}$ , C, 61.1; H, 5.5; N, 10.2%. Found: C, 60.7; H, 5.2; N, 9.8%.

### Synthesis of the complex $[\text{Cu}_2(\text{L}^1)_2](\text{BPh}_4)_2$ .

To a suspension of  $\text{L}^1$  (0.010g, 0.018 mmol) in acetone (2  $\text{cm}^3$ ),  $\text{Cu}(\text{MeCN})_4\text{PF}_6$  (0.007g, 0.018 mmol) was added and the solution was stirred until dissolution was complete. To this was added excess  $\text{NH}_4\text{BPh}_4$  and the solution filtered. Slow diffusion of ethyl acetate gave  $[\text{Cu}_2(\text{L}^1)_2](\text{BPh}_4)_2$  as dark red crystals Supplementary Material for Chemical Communications

(41% yield). ESI-MS:  $m/z$  1546 [M-(BPh<sub>4</sub>)<sup>-</sup>]. Elemental Analysis calculated for C<sub>104</sub>H<sub>100</sub>N<sub>8</sub>B<sub>2</sub>Cu<sub>2</sub>O<sub>12</sub>S<sub>2</sub>, C, 66.9; H, 5.4; N, 6.0%. Found C, 66.1; H, 5.6; N, 5.5%.

**Synthesis of the complex [Cu<sub>2</sub>(L<sup>1</sup>)<sub>2</sub>Ba<sub>2</sub>](ClO<sub>4</sub>)<sub>6</sub>.**

To a suspension of L<sup>1</sup> (0.010g, 0.018 mmol) in acetonitrile (2 cm<sup>3</sup>), Cu(MeCN)<sub>4</sub>PF<sub>6</sub> (0.007g, 0.018 mmol) was added and the solution was stirred until dissolution was complete. To this was then added excess Ba(ClO<sub>4</sub>)<sub>2</sub> and the complex isolated by slow diffusion of ethyl acetate giving yellow crystals of [Cu<sub>2</sub>(L<sup>1</sup>)<sub>2</sub>Ba<sub>2</sub>](ClO<sub>4</sub>)<sub>6</sub> which lost solvent rapidly (45% yield). ESI-MS:  $m/z$  949 [M-2(ClO<sub>4</sub>)<sup>-</sup>]. Elemental Analysis calculated for C<sub>56</sub>H<sub>60</sub>N<sub>8</sub>Ba<sub>2</sub>Cl<sub>6</sub>Cu<sub>2</sub>O<sub>36</sub>S<sub>2</sub>, C, 32.0; H, 2.9; N, 5.3%. Found C, 31.6; H, 3.0; N, 4.9%.

References

- 1 C. Naumann and H. Langhals, *Synthesis*, 1990, 279.
- 2 J. Rebek, Jr. and R.V. Wattlely, *J. Heterocycl. Chem.* 1980, **17**, 749.
